# Supplementary material
Source: PubMed Central journal article supplement (PMC7723948)

## Städteregion Aachen

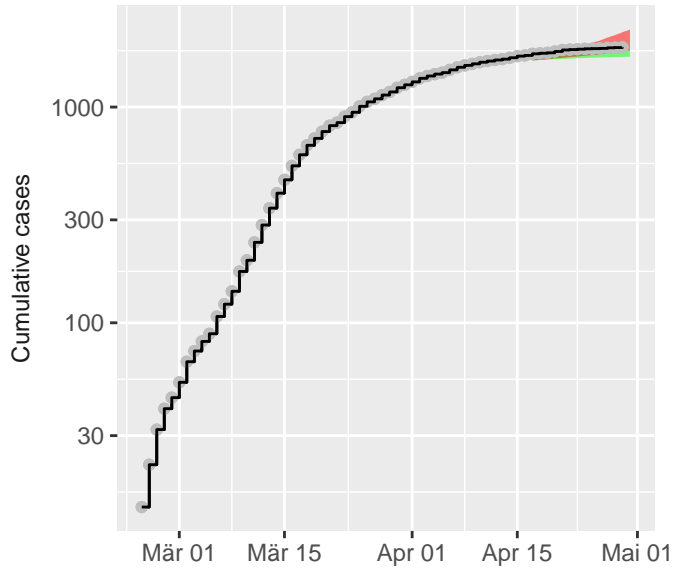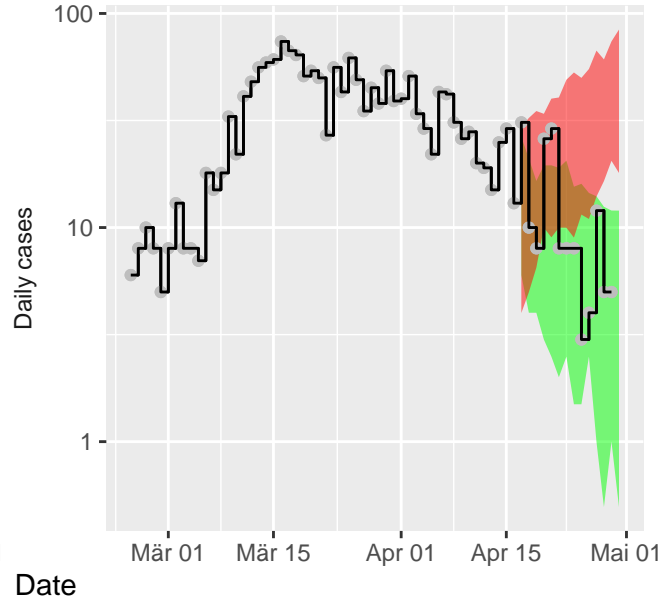

## Wesel

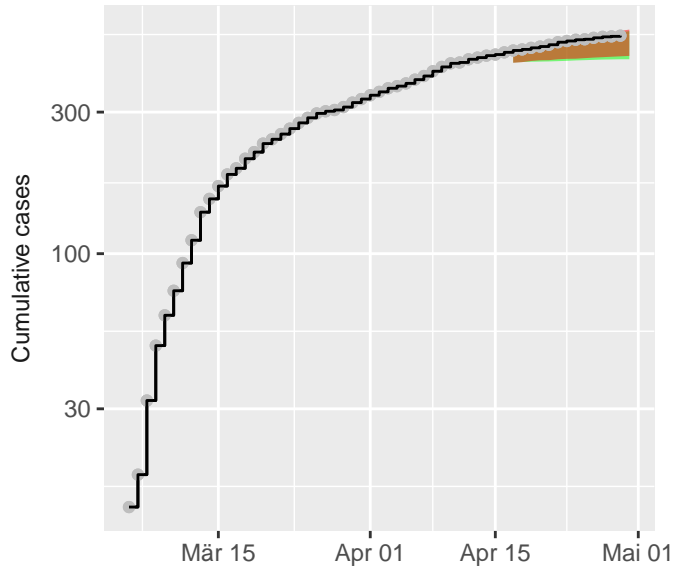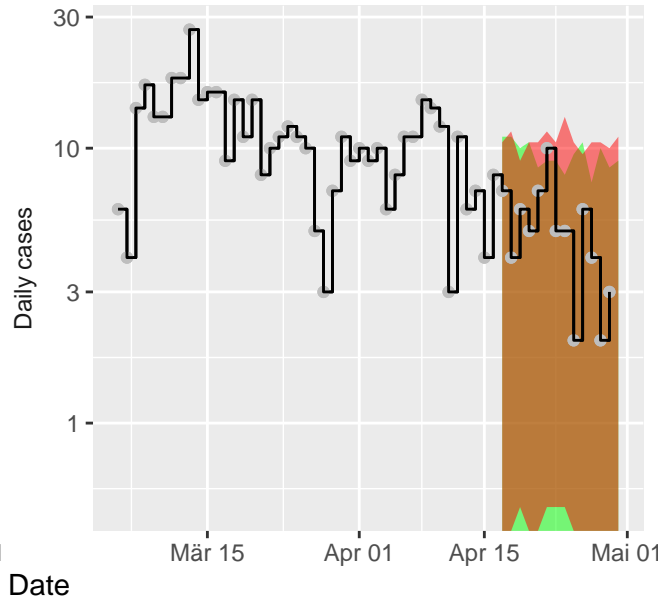

Supplement: 11538_2020_834_MOESM2_ESM.pdf [file 11538_2020_834_MOESM2_ESM.pdf]
