# Supplementary material
Source: PubMed Central journal article supplement (PMC7723948)

## Schwäbisch Hall

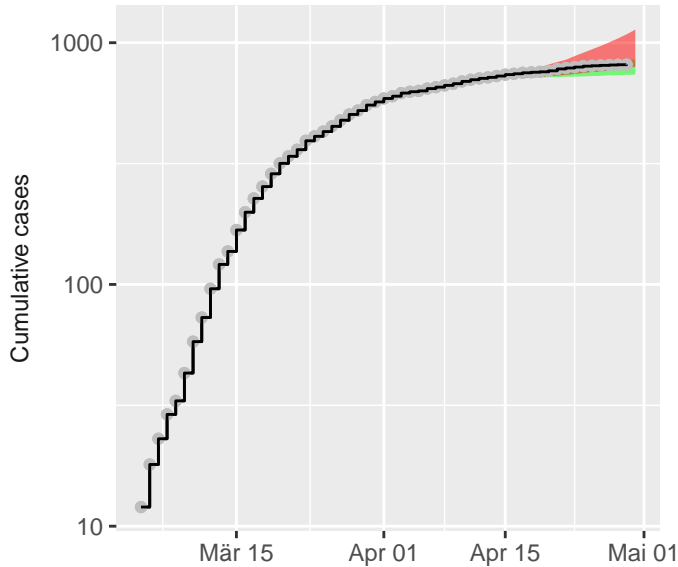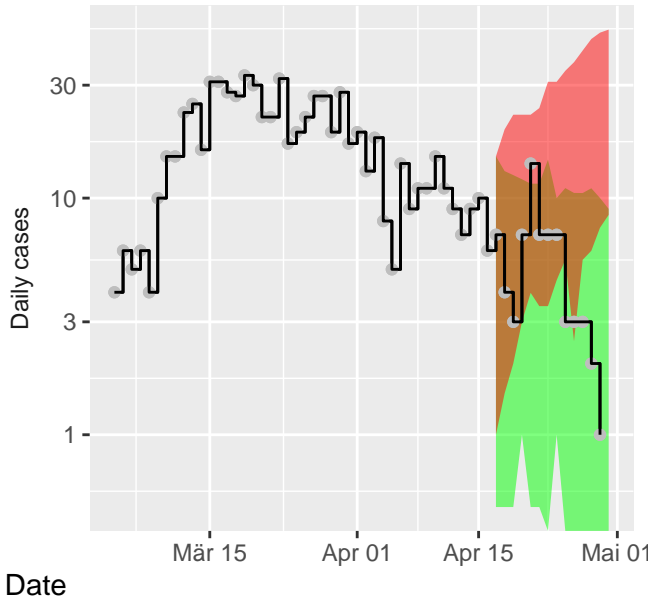

## Köln

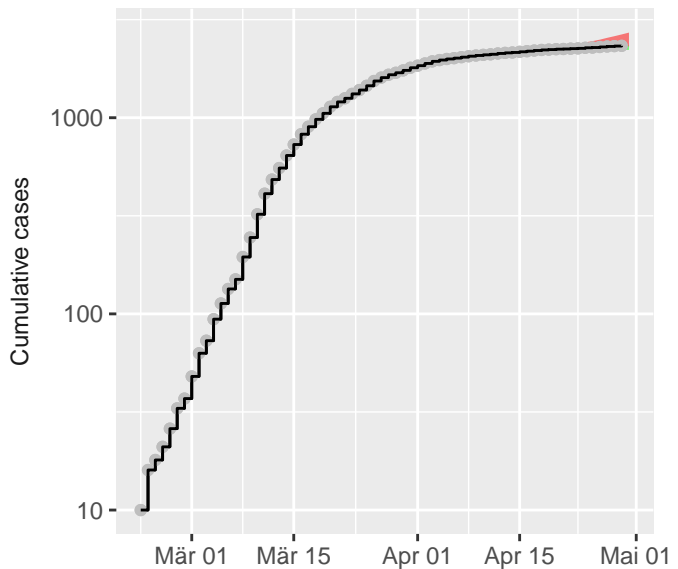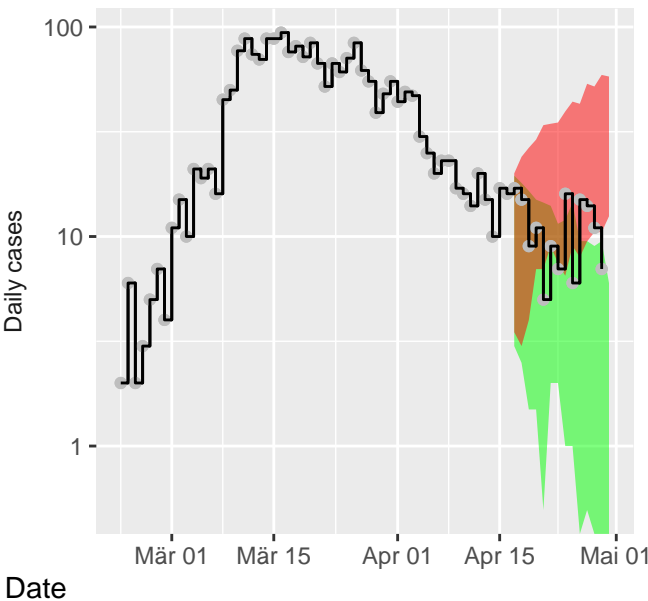

Supplement: 11538_2020_834_MOESM3_ESM.pdf [file 11538_2020_834_MOESM3_ESM.pdf]
