# Supplementary material
Source: PubMed Central journal article supplement (PMC7723948)

## Potsdam

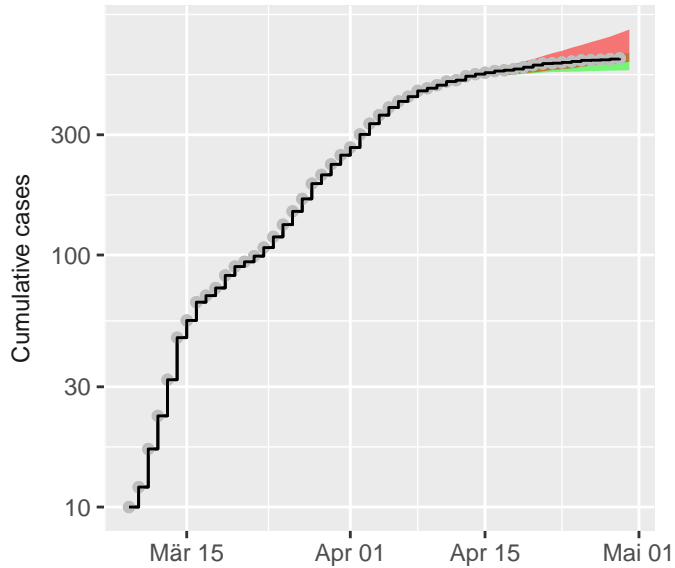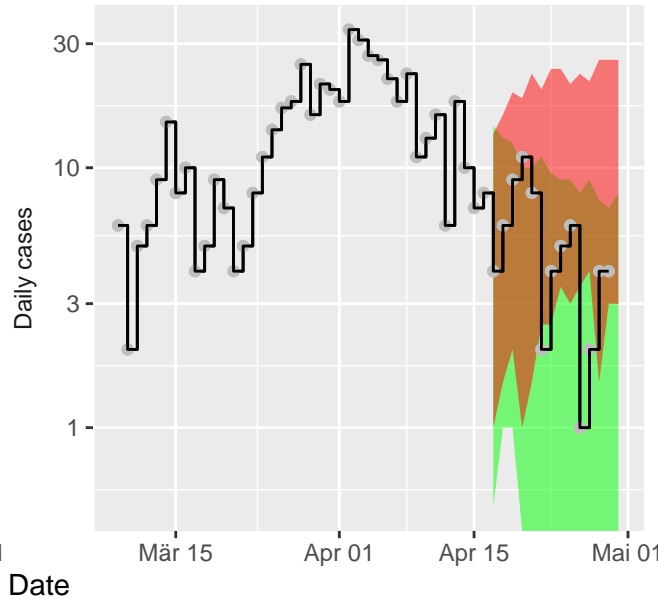

## Starnberg

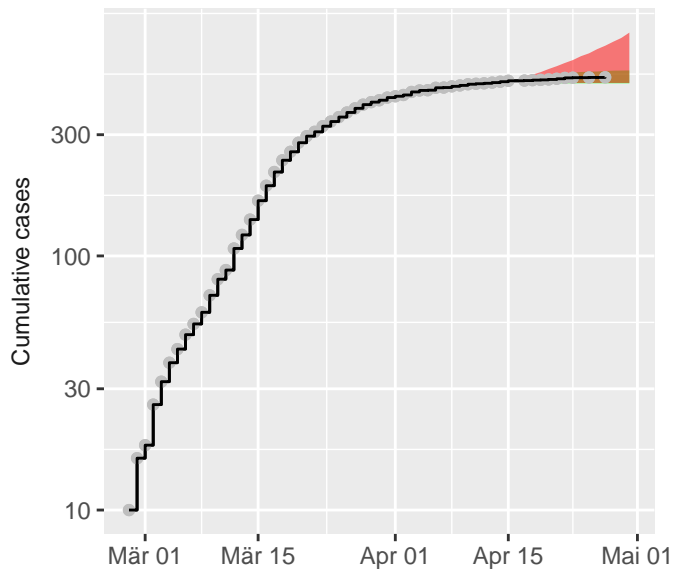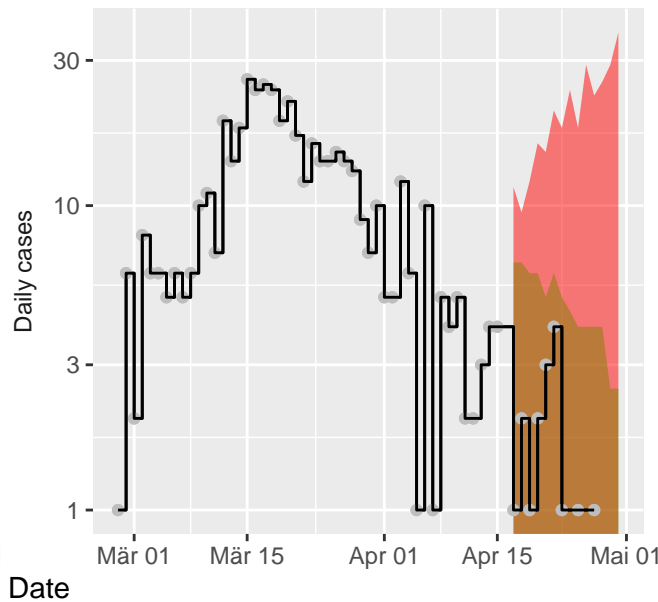

Supplement: 11538_2020_834_MOESM4_ESM.pdf [file 11538_2020_834_MOESM4_ESM.pdf]
