# Supplementary material
Source: PubMed Central journal article supplement (PMC7723948)

## Dresden

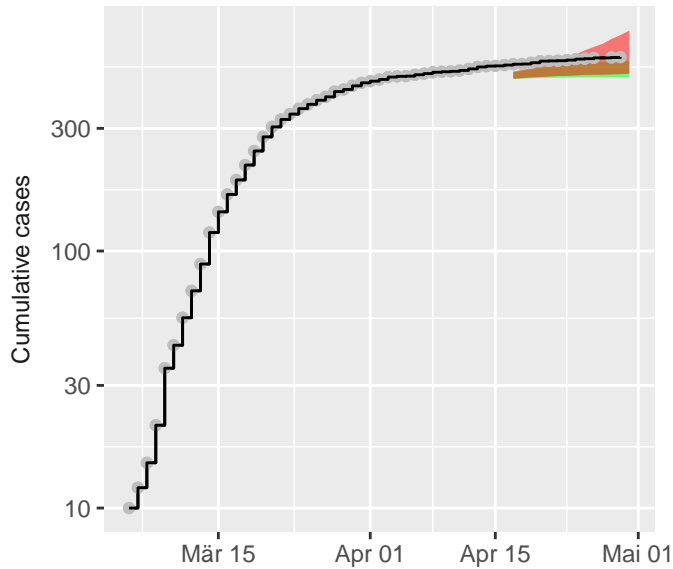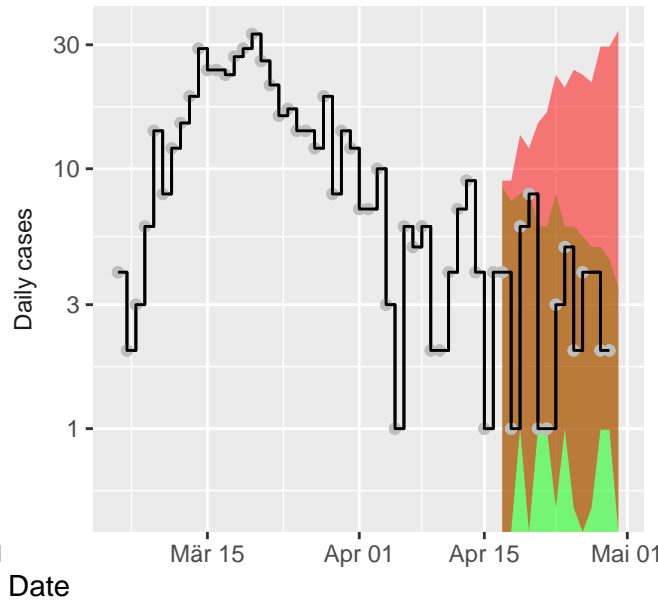

## Potsdam

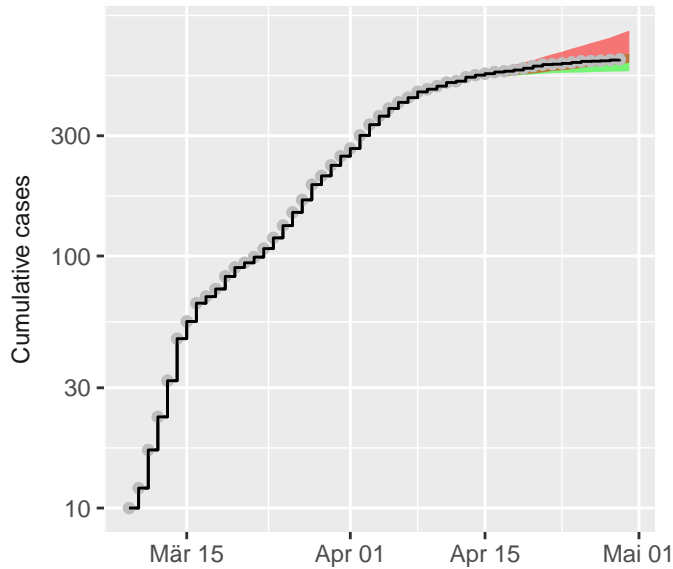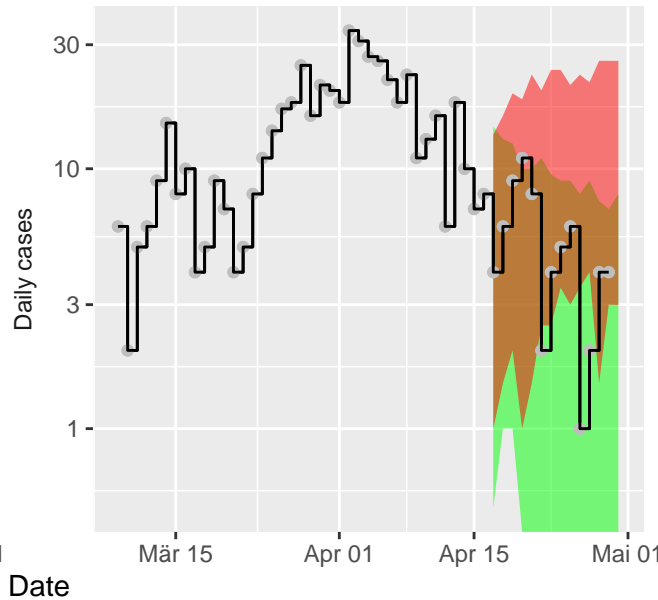

Supplement: 11538_2020_834_MOESM5_ESM.pdf [file 11538_2020_834_MOESM5_ESM.pdf]
