# Supplementary material
Source: PubMed Central journal article supplement (PMC7723948)

## Hohenlohekreis

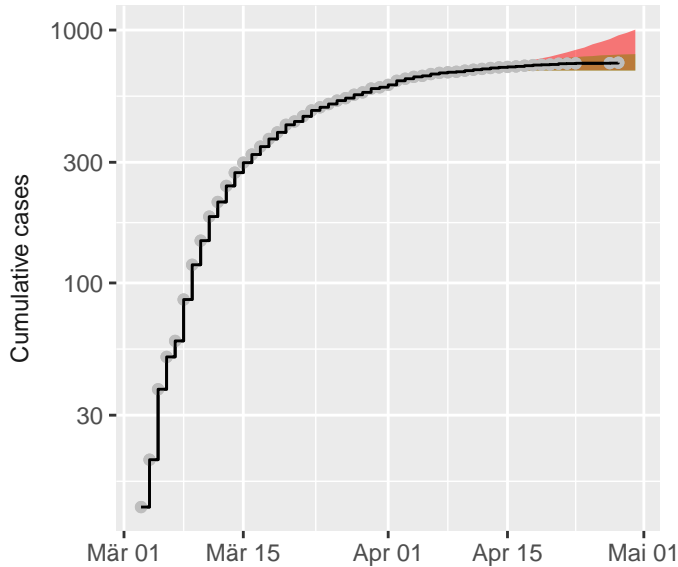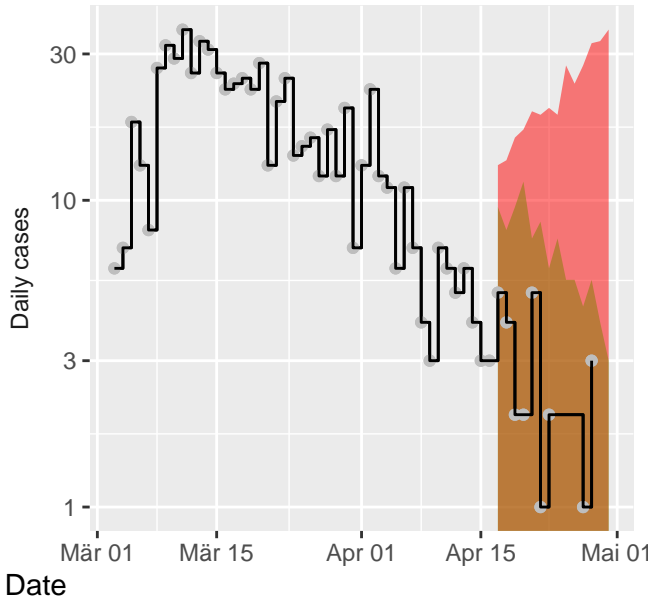

## Tübingen

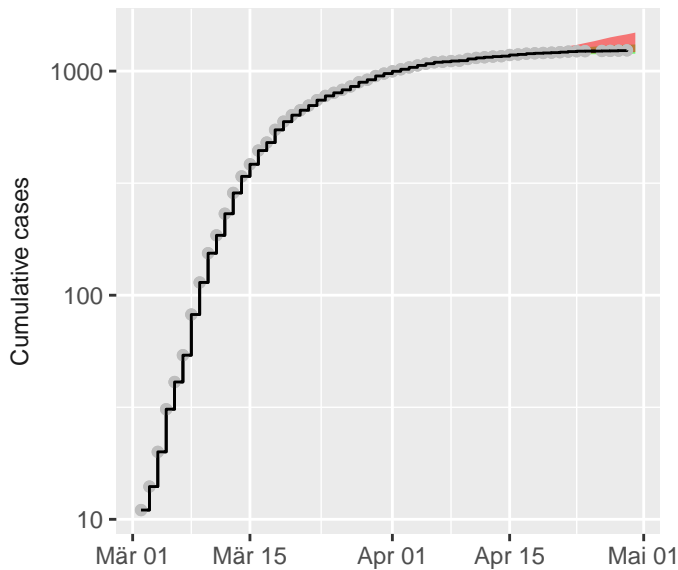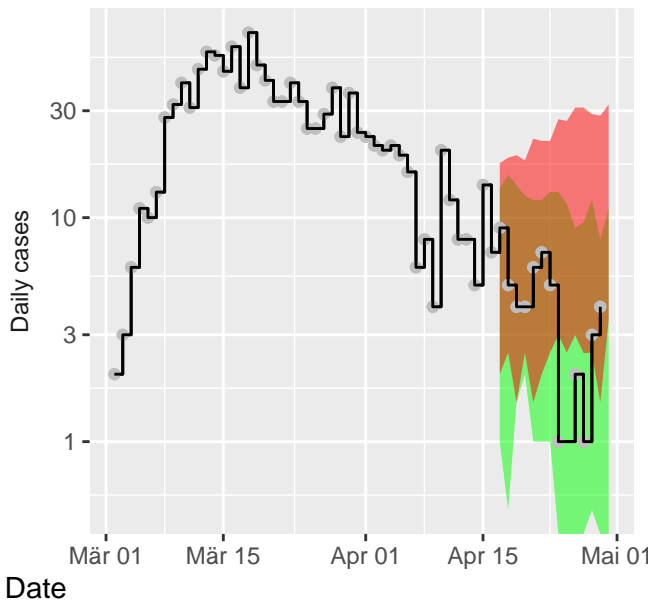

Supplement: 11538_2020_834_MOESM6_ESM.pdf [file 11538_2020_834_MOESM6_ESM.pdf]
